# Supplementary material for: Improved Bioavailability and High Photostability of Methotrexate by Spray-Dried Surface-Attached Solid Dispersion with an Aqueous Medium
Source: PubMed Central journal article supplement (PMC7830624; doi:10.3390/pharmaceutics13010111), 2021-01-16
Supplement: pharmaceutics-13-00111-s001.pdf [file pharmaceutics-13-00111-s001.pdf]

Supplementary data

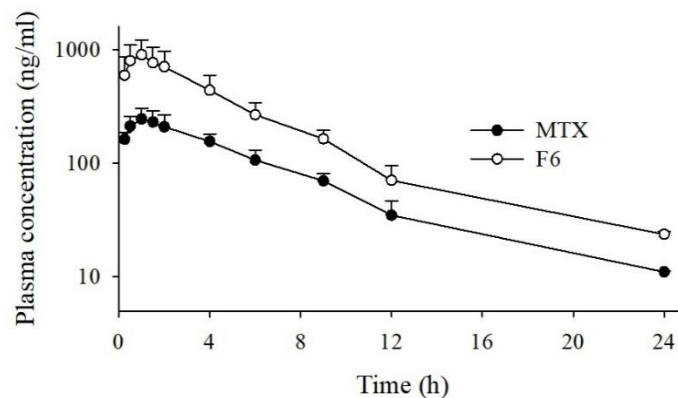

**Figure S1.** Plasma concentration (log scale)–time profiles of MTX after oral administration of free drug or F6 formulation in rats.
