# Supplementary material for: Improved Bioavailability and High Photostability of Methotrexate by Spray-Dried Surface-Attached Solid Dispersion with an Aqueous Medium
Source: MDPI journal article supplement (doi:10.3390/pharmaceutics13010111), 2021-01-16
Supplement: s1 [file s1]

# Supplementary Materials: Improved Bioavailability and High Photostability of Methotrexate by Spray-Dried Surface-Attached Solid Dispersion with an Aqueous Medium

Bhupendra Raj Giri, Jung Suk Kim, Jong Hyuck Park, Sung Gyu Jin, Kyeong Sook Kim, Fakhar ud Din, Han-Gon Choi and Dong Wuk Kim

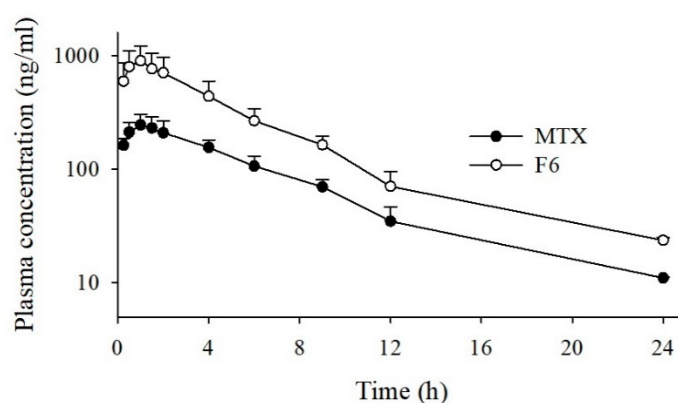

**Figure 1.** Plasma concentration (log scale)–time profiles of MTX after oral administration of free drug or F6 formulation in rats.
